# Supplementary material for: A Diagnostic Chip for the Colorimetric Detection of Legionella pneumophila in Less than 3 h at the Point of Need
Source: MDPI journal article supplement (doi:10.3390/bios14050228), 2024-05-04
Supplement: s1 [file s1]

## Supplementary Material

### A Diagnostic Chip for the Colorimetric Detection of *Legionella pneumophila* in Less than 3 h at the Point of Need

Katerina Tsougeni <sup>1</sup>, Anastasia Kanioura <sup>1</sup>, Athina S. Kastania <sup>1,2</sup>, Kosmas Ellinas <sup>1,†</sup>, Antonios Stellas <sup>3</sup>, Vassilios Constantoudis <sup>2,3</sup>, Galatios Moschonas <sup>4</sup>, Nikolaos D. Andritsos <sup>4,‡</sup>, Manolis Velonakis <sup>4</sup>, Panagiota S. Petrou <sup>1,2</sup>, Sotirios E. Kakabakos <sup>1,2</sup>, Evangelos Gogolides <sup>1,2</sup> and Angeliki Tserepi <sup>1,2,\*</sup>

3 types of water samples (i.e. drinking water, non-drinking water and drilling water) were used with known contamination concentration at 3 different levels: zero level ( $L_0$ , do not contain *Legionella*), medium level ( $L_1 > 1-2 \times 10^2$  CFU/100 mL), and high level ( $L_2 > 2 \times 10^3$  CFU/100 mL). In each case, 15 repetitive analyses were performed. Representative images of the results are shown in Table S1.

**Table S1:** Representative images are shown (out of 15) for each water type, spiked with *Legionella* concentration at three levels

| Sample             | Zero level ( $L_0$ )                                                                | Medium level ( $L_1$ )                                                               | High level ( $L_2$ )                                                                  |
|--------------------|-------------------------------------------------------------------------------------|--------------------------------------------------------------------------------------|---------------------------------------------------------------------------------------|
| Drinking water     |  |  |  |
| Drilling water     |  |  |  |
| Non-drinking water |  |  |  |
